# Supplementary material
Source: Springer Nature journal article supplement (https://www.springermedizin.de/resource/supplementary/12936_2008_620_MOESM8_ESM.pdf/9547840)
Supplement: MOESM8 [file 9547840]

**Logistic regression models for prediction of use of any net by under-five children**

| Variables                        | <b>*Model 1 (Combined)</b><br>(n=3163) |             |          | Variables                        | <b>+Model 2 (Urban)</b><br>(n=1967) |           |          | Variables                       | <b>++Model 3 (Rural)</b><br>(n=1172) |           |          |
|----------------------------------|----------------------------------------|-------------|----------|----------------------------------|-------------------------------------|-----------|----------|---------------------------------|--------------------------------------|-----------|----------|
|                                  | **OR                                   | 95% CI**    | #P-value |                                  | OR                                  | 95% CI    | #P-value |                                 | OR                                   | 95% CI    | #P-value |
| <i>Fever/convulsion episode</i>  |                                        |             |          | <i>CWI*Caregiver's education</i> |                                     |           |          | <i>Fever/convulsion episode</i> |                                      |           |          |
| No                               | 1.00                                   |             |          | CWI*None                         | 1.00                                |           |          | No                              | 1.00                                 |           |          |
| Yes                              | 1.28                                   | 1.14 -1.45  | <0.0001  | CWI*Educated                     | 1.30                                | 1.05-1.57 | 0.017    | Yes                             | 1.49                                 | 1.11-1.99 | 0.008    |
| <i>Health facility</i>           |                                        |             |          | <i>Health facility</i>           |                                     |           |          | <b>**CWI</b>                    |                                      |           |          |
| Absent                           | 1.00                                   |             |          | Absent                           | 1.00                                |           |          | 1.17                            | 1.01-1.37                            | 0.038     |          |
| Present                          | 1.29                                   | 1.01 - 1.63 | 0.039    | Present                          | 2.26                                | 1.39-4.65 | 0.001    |                                 |                                      |           |          |
| <i>Caregiver's education</i>     |                                        |             |          | <i>Caregiver's education</i>     |                                     |           |          |                                 |                                      |           |          |
| None                             | 1.00                                   |             | 0.016    | None                             | 1.00                                |           |          |                                 |                                      |           |          |
| Educated                         | 1.40                                   | 1.06- 1.84  |          | Educated                         | 2.16                                | 1.22-3.81 | 0.008    |                                 |                                      |           |          |
| <i>CWI*Caregiver's education</i> |                                        |             |          | <i>Age in years</i>              |                                     |           |          |                                 |                                      |           |          |
| CWI*None                         | 1.00                                   |             |          | Less than 2                      | 1.00                                |           |          |                                 |                                      |           |          |
| CWI*Educated                     | 1.29                                   | 1.14-1.45   | <0.0001  | >2 and < 5                       | 0.56                                | 0.36-0.85 | 0.007    |                                 |                                      |           |          |
| <i>Residence</i>                 |                                        |             |          |                                  |                                     |           |          |                                 |                                      |           |          |
| Urban                            | 1.00                                   |             |          |                                  |                                     |           |          |                                 |                                      |           |          |
| Rural                            | 1.43                                   | 1.12 -1.82  | 0.004    |                                  |                                     |           |          |                                 |                                      |           |          |

Missing data excluded from all analysis.

\*\* OR, adjusted odds ratio; CI, 95% confidence interval

#P-value for Wald statistic

\*\*CWI, combined

wealth index CWI\*Caregiver's education, interaction term for combined wealth index and caregiver's education

\*Model 1: for combined data; adjusted for child's age, family size, religion, region (dichotomised), region by residence, and combined wealth index (as a continuous variable); Hosmer & Lemeshow test for goodness-of-fit =0.225

+Model 2 for urban children; adjusted for family size, region (dichotomised), religion, fever/convulsion episode, and combined wealth index (as a continuous variable). H&L test for goodness-of-fit= 0.72

++Model 3 for rural children also adjusted for age, family size, region (dichotomised), religion, caregiver's education, and combined wealth index by caregiver's education H&L test for goodness-of-fit =0.23
